# Supplementary material
Source: PubMed Central journal article supplement (PMC3369681)
Supplement: supp_blood-2012-02-408674_blood-2012-02-408674-1.pdf [file supp_blood-2012-02-408674_blood-2012-02-408674-1.pdf]

**Table S1**

| <b>Wt fibroblasts</b>                                    | <b><i>Fanca</i><sup>-/-</sup> fibroblasts</b>                                                                                                    | <b><i>Fanca</i><sup>-/-</sup> iPSC</b>                     |
|----------------------------------------------------------|--------------------------------------------------------------------------------------------------------------------------------------------------|------------------------------------------------------------|
| 40, XY [18] (P2)                                         | 40, XY [18] (P2)<br>4 cells contained a total of 3 chromatid breaks, 2 chromatid gaps, 1 chromosome gap and 2 marker chromosomes                 | 40, XY [15] / 39, X, -Y [2] (P4)                           |
| 40, XX [16] (P2)                                         | 40, XX [11] (P2)                                                                                                                                 | 40, XY [15] / 41, XYY [3](P5)                              |
| 40, XX [20] (P3)                                         | 40, XY [16] (P2)<br>5 cells contained breakage, with a total of 13 chromatid breaks, 5 chromatid gaps, 3 double minutes, and 1 marker chromosome | 40, XY [16] / 39, X, -Y [3] (P6)                           |
| 40, XY [20] (P3)<br>2 cells exhibited a chromosome break | 40, XY [20] (P3)<br>Chromosome breaks in 6 cells, 1 cell contained an acentric chromosome fragment                                               | 39, X [20] (P6)<br><br>39, X [18] / 39, X, add(3) [2] (P7) |

**Table S2**

| <b>Sample #</b> | <b>iPSC clone (passage #)</b>           | <b>CHG result</b>                                                                                                                                                                                      |
|-----------------|-----------------------------------------|--------------------------------------------------------------------------------------------------------------------------------------------------------------------------------------------------------|
| 1               | WT 1 + GFP (6)                          | Chromosome 1: 49 kb gain<br>Start: 173444942<br>End: 173493944<br>Chromosome 14: 205 KB gain<br>Start: 69877295<br>End: 70082914                                                                       |
| 2               | WT 2 + GFP (6)                          | No significant aberration                                                                                                                                                                              |
| 3               | <i>Fanca</i> <sup>-/-</sup> + GFP (5)   | Chromosome 4: 152089 KB loss<br>Start: 3463864<br>End: 1.56E+08<br>Chromosome 14: 115837 KB loss<br>Start: 8670652<br>End: 1.25E+08<br>Chromosome 17: 90580 KB loss<br>Start: 3119246<br>End: 93699798 |
| 4               | <i>Fanca</i> <sup>-/-</sup> + GFP (4)   | No significant aberration                                                                                                                                                                              |
| 5               | <i>Fanca</i> <sup>-/-</sup> + GFP (4)   | No significant aberration                                                                                                                                                                              |
| 6               | <i>Fanca</i> <sup>-/-</sup> + FANCA (4) | Chromosome 2: 3474 KB loss<br>Start: 39924441<br>End: 43399236<br>Chromosome 19: 3599 KB loss<br>Start: 20414325<br>End: 24013487                                                                      |
| 7               | <i>Fanca</i> <sup>-/-</sup> + FANCA (4) | No significant aberration                                                                                                                                                                              |
| 8               | <i>Fanca</i> <sup>-/-</sup> + FANCA (4) | No significant aberration                                                                                                                                                                              |

**Table S3**

| <b>Clone #</b> | <b>Normal donor<br/>iPSC</b> | <b>FANC-A +<br/><i>FANCA</i><br/>iPSC</b> |
|----------------|------------------------------|-------------------------------------------|
| 1              | 46 XY [20]                   | 46 XY [20]                                |
| 2              | 46, XY [20]                  | 46 XY [18]                                |
| 3              | 46 XY [20]                   | 46 XY [20]                                |

Figure S1

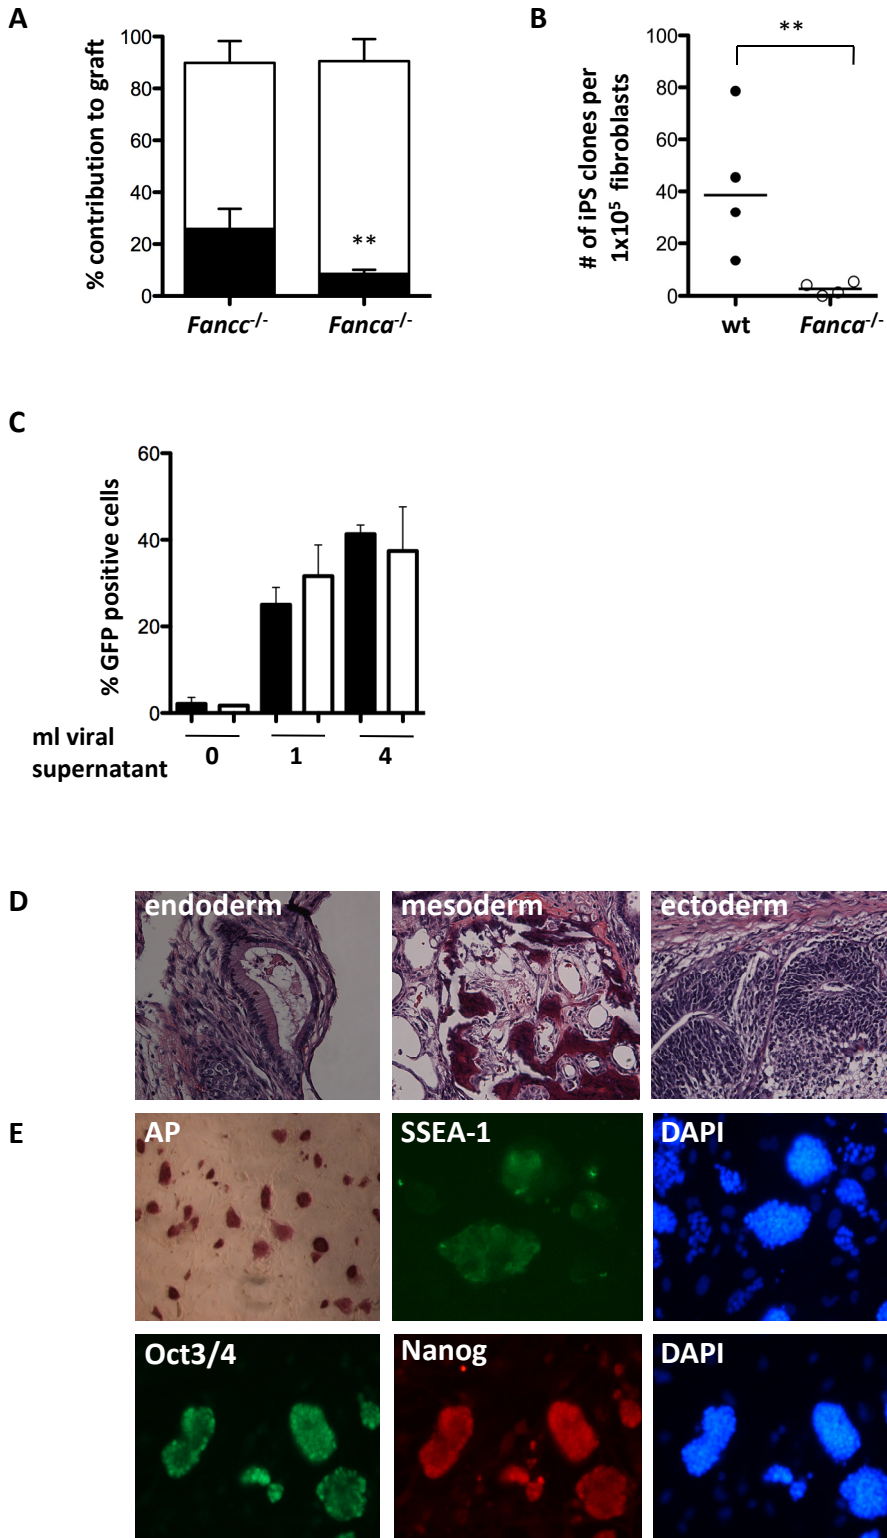

Figure S2

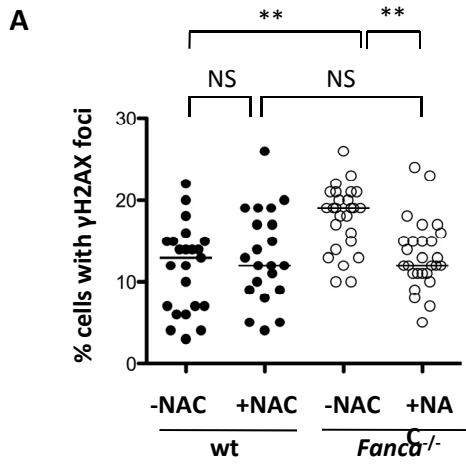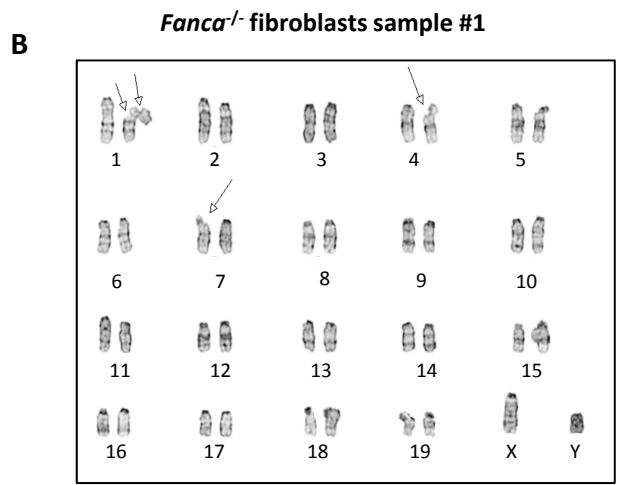

Figure S3

A

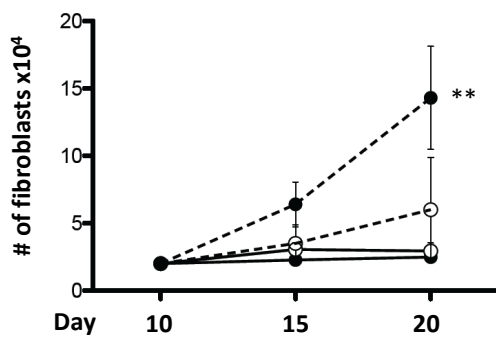

B

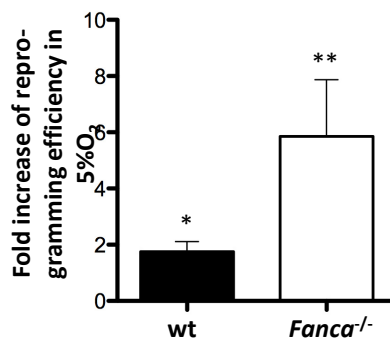

C

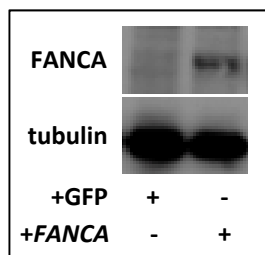

Figure S4

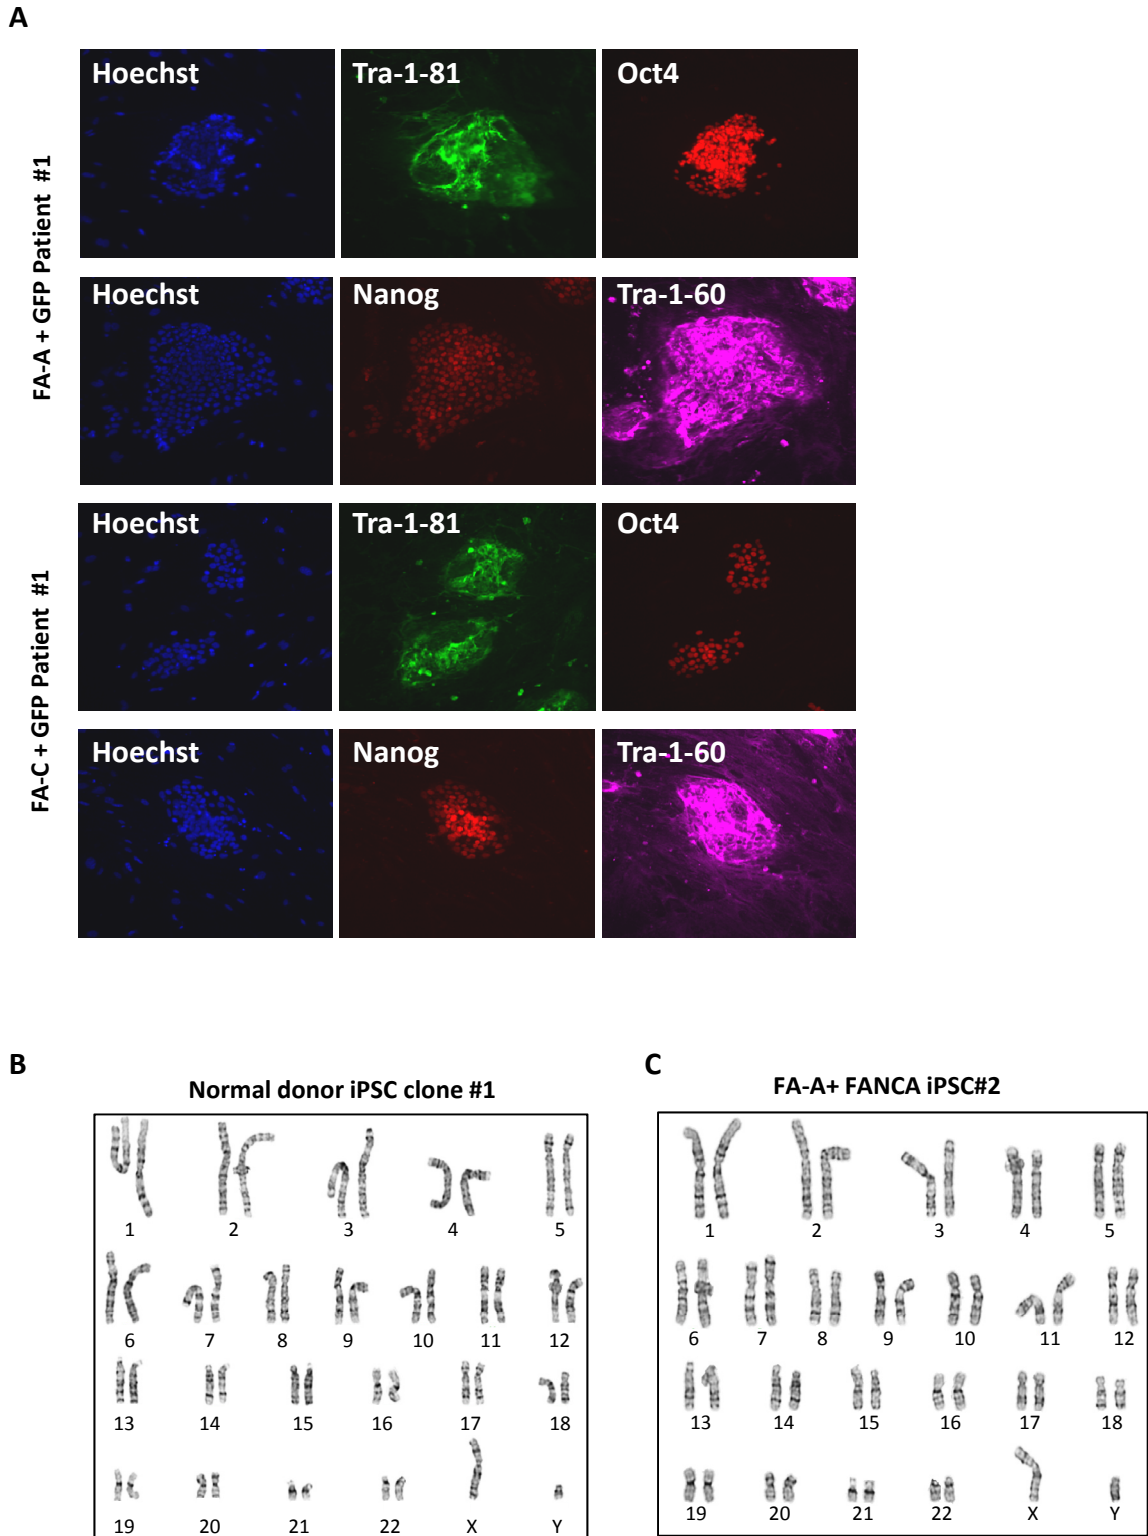

## Supplemental Legends

**Table S1: Summary of karyotype analyses of fibroblasts and iPSC lines.** Number of metaphases analyzed and passage number are indicated in brackets.

**Table S2:** Comparative genomic hybridization (CGH) of murine fibroblasts and resultant iPSC. DNA extracted from the starting fibroblast population and resultant iPSC was assessed for chromosomal imbalances using an oligo-based 44k array platform. Chromosome gains or losses observed in unique samples are denoted.

**Table S3: Summary of human iPSC line karyotype analysis.** The number of metaphases analyzed is noted in brackets.

**Figure S1: Engraftment, transduction efficiency and teratoma formation.** (A) Competitive repopulation of *Fancc*<sup>-/-</sup> and *Fanca*<sup>-/-</sup> low-density mononuclear bone marrow cells.  $5 \times 10^5$  knock-out test cells (CD45.1) and  $5 \times 10^5$  wt competitor cells (CD45.1/CD45.2) were co-injected into lethally irradiated wt BL-6 (CD45.2) recipient mice. The figure shows the mean percentage of test (solid black bars) and competitor cell (open white bars) chimerism in the graft at eight weeks post-transplantation ( $\pm$ SD. *Fancc*<sup>-/-</sup>: n=36 mice; *Fanca*<sup>-/-</sup>: n=19 mice). \*\*P<0.01 for the comparison between *Fancc*<sup>-/-</sup> and *Fanca*<sup>-/-</sup> chimerism (Wilcoxon rank-sum test). (B) Reprogramming efficiency of  $1 \times 10^5$  wt or *Fanca*<sup>-/-</sup> TTF reprogrammed in the absence of c-Myc (Okt3/4, Sox2, Klf4). (C) Assessment of retroviral transduction efficiency. Wt (black bars) and *Fanca*<sup>-/-</sup> (open bars) tail-tip fibroblasts were transduced with an eGFP-encoding retrovirus at the time of reprogramming. Percentage of GFP+ fibroblasts was determined after 48hrs by FACS analysis (n=3,  $\pm$ SD). (D) Hematoxylin-eosin stains of teratomas obtained by subcutaneous injection of *Fancc*<sup>-/-</sup> iPS cells (4x and 20x magnification). (E) Immunofluorescence demonstrating the expression of pluripotency markers in *Fanca*<sup>-/-</sup> iPSC. SD: Standard deviation



**Figure S2: *Fanca*<sup>-/-</sup> tail-tip fibroblasts contain increased chromosome breaks.** (A) Median percentage of tail-tip fibroblasts containing  $\geq 5$   $\gamma$ H2AX four days after the infection with the reprogramming viruses. NAC: N-acetylcysteine (100  $\mu$ M). (B) Example of *Fanca*<sup>-/-</sup> fibroblast karyogram displaying chromosome breaks prior to reprogramming. \*\*p < 0.01, NS: not significant

**Figure S3: Hypoxia enhances fibroblasts growth and reprogramming.** (A) Growth rate of wt and *Fanca*<sup>-/-</sup> fibroblasts between days 10-20 post derivation in 21% and 5% O<sub>2</sub>. Solid line: 21% O<sub>2</sub>, broken line: 5% O<sub>2</sub>, solid circle: Wt, open circle: *Fanca*<sup>-/-</sup> (n=9,  $\pm$ SEM. \*\*p < 0.01 for comparison of cell number at 5% and 21% O<sub>2</sub> in wt). (B) Fold increase of iPS reprogramming efficiency in 21% or 5% O<sub>2</sub> (wt: n=18; *Fanca*<sup>-/-</sup> n=14 independent reprogramming experiments, \*P < 0.05, \*\*P < 0.01 for the comparison of 21% vs. 5% O<sub>2</sub>). (C) FANCA expression as demonstrated by immunoblot in *Fanca*<sup>-/-</sup> iPS clones that were control transduced with eGFP or complemented with FANCA.

**Figure S4: Human Fanconi anemia iPSC are pluripotent.** (A) Immunofluorescence of uncomplemented patient-derived FA-A and FA-C iPSC. (B) Karyogram of a complemented patient-derived FA-A iPSC line.
